# Supplementary material
Source: publisher figshare collection journal article supplement (https://gsajournals.figshare.com/articles/dataset/_/14568864)

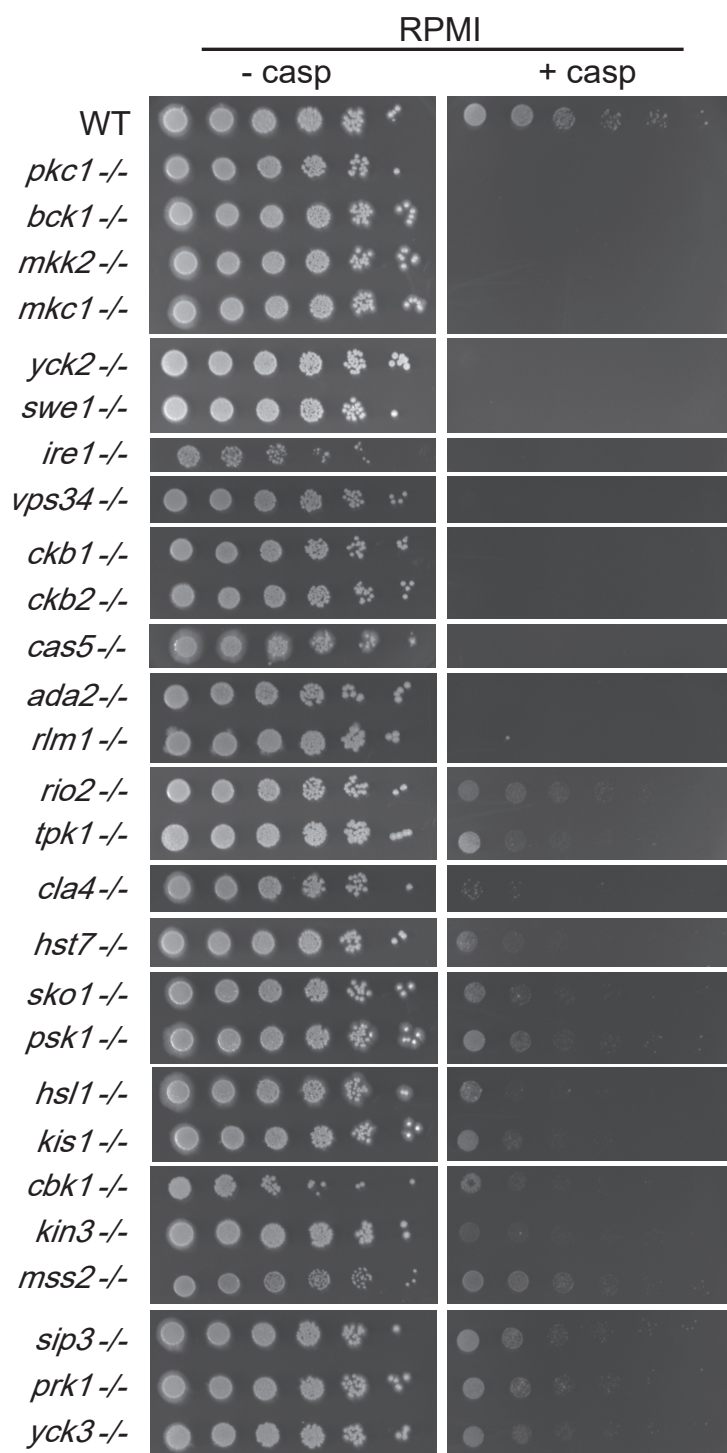

Supplement: Supplementary file 1 [file 1]

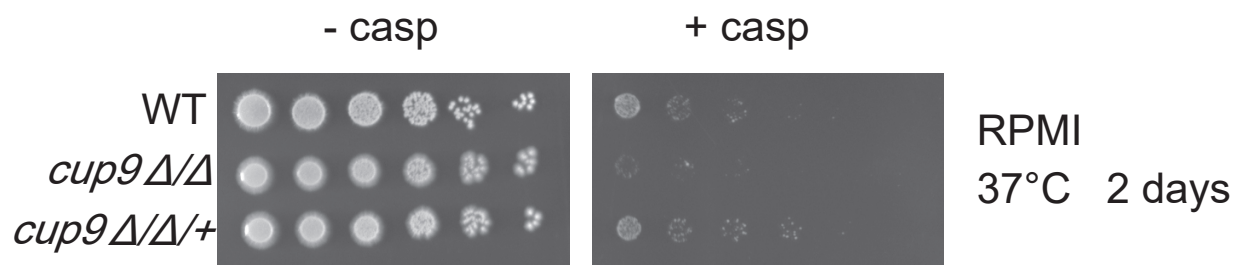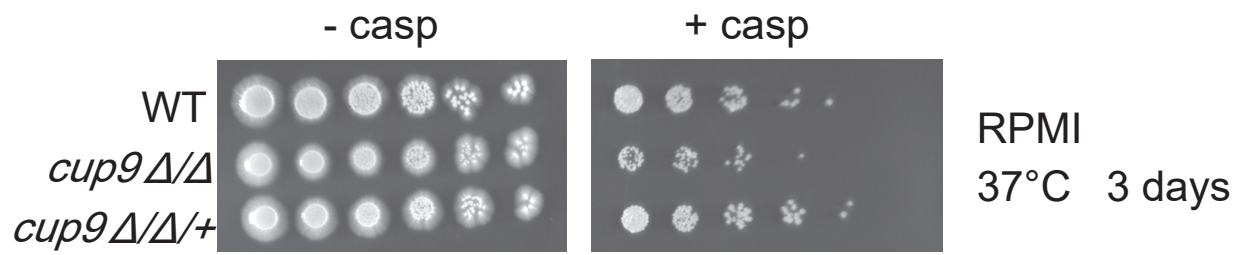

Supplement: Supplementary file 2 [file 1]

WT

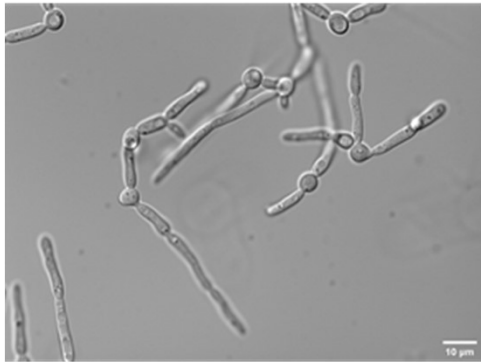

*cup9Δ/Δ*

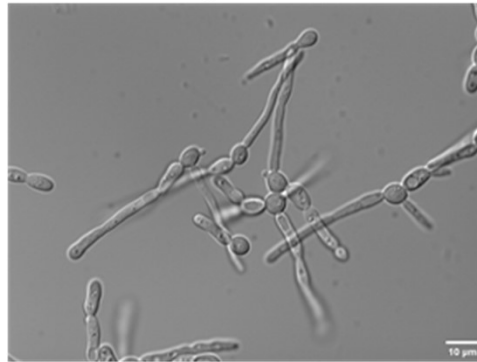

*efg1Δ/Δ*

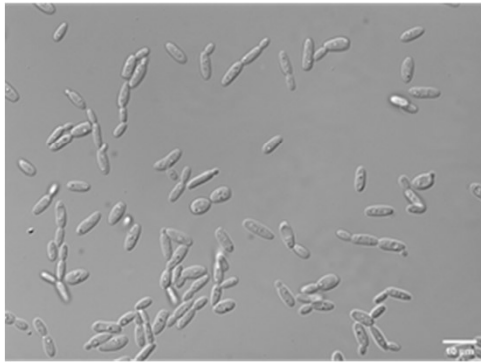

*efg1(Δ/Δ)+/+*

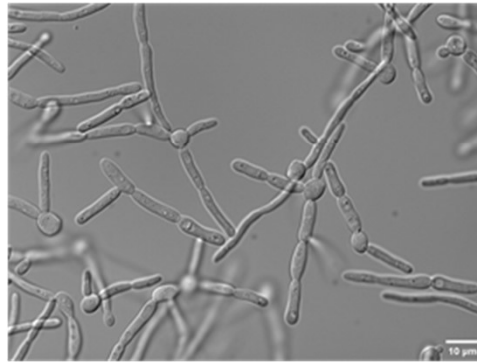

*cup9Δ/Δ efg1Δ/Δ*

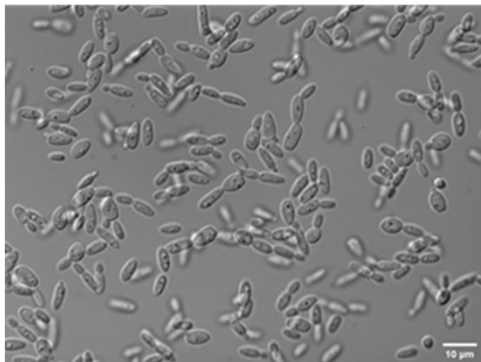

*cup9Δ/Δ efg1(Δ/Δ)+/+*

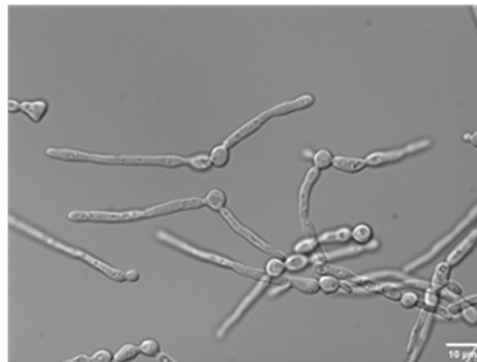

Supplement: Supplementary file 3 [file 1]
